# Supplementary material for: Activating an Adaptive Immune Response with a Telomerase-Mediated Telomere Targeting Therapeutic in Hepatocellular Carcinoma
Source: Oxford University Press journal article supplement (doi:10.1158/1535-7163.mct-23-0039), 2023-04-18
Supplement: mct-23-0039_supplementary_table1_suppst1.docx [file mct-23-0039_supplementary_table1_suppst1.docx]

Supplementary Table1. Immuno-oncology-related proteins quantified in Digital Spatial Profiling

| Protein name | Full target name | Category | Accession | Protein ID |
| --- | --- | --- | --- | --- |
| PD-1 | programmed cell death 1 | Immune checkpoint | Q02242, Q544F3 | DPROT_00065.1 |
| PD-L1 | CD274 antigen | Immune checkpoint | Q3U472, Q9EP73 | DPROT_00080.1 |
| CTLA4 | cytotoxic T-lymphocyte-associated protein 4 | Immune checkpoint | Q5SSM0, P09793, Q6GTR6 | DPROT_00018.1 |
| CD28 | CD28 antigen | Immune checkpoint | P31041, Q8CDB3 | DPROT_00260.1 |
| CD86 | CD86 antigen | Immune checkpoint | P42082, Q549Q9, Q61238 | DPROT_00273.1 |
| B7-H3 | CD276 antigen | Immune checkpoint | A6MDC5, Q8VE98 | DPROT_00032.1 |
| VISTA | RIKEN cDNA 4632428N05 gene | Immune checkpoint | Q9D659, A0A171EBK7 | DPROT_00084.1 |
| Tim-3 | hepatitis A virus cellular receptor 2 | Immune checkpoint | Q8VIM0 | DPROT_00083.1 |
| LAG3 | lymphocyte-activation gene 3 | Immune checkpoint | Q61790 | DPROT_00082.1 |
| FOXP3 | forkhead box P3 | T cell, marker | Q53Z59, Q99JB6 | DPROT_00090.1 |
| CD4 | CD4 antigen | T cell, marker | P06332, Q3TSV7 | DPROT_00075.1 |
| CD8a | CD8 antigen, alpha chain | T cell, marker | P01731, Q8CAX3 | DPROT_00078.1 |
| CD40L | CD40 ligand | T cell, marker | P27548, Q0VEI3 | DPROT_00088.1 |
| CD127/IL7RA | interleukin 7 receptor | T cell, marker | P16872, Q5FW78, Q8C9W4 | DPROT_00036.1 |
| GITR | tumor necrosis factor receptor superfamily,  member 18 | T cell, status/function | O35714, Q540M6 | DPROT_00035.1 |
| GZMB | granzyme B | T cell, status/function | P04187, Q3TZH4 | DPROT_00079.1 |
| OX40L | tumor necrosis factor | T cell, status/function | B6DXE3, P43488 | DPROT_00028.1 |
| CD27 | CD antigen 27 | T cell, status/function | P41272, Q3U4X0, B7ZW87, D3Z7W5 | DPROT_00089.1 |
| CD44 | CD44 antigen | T cell, status/function | Q80X37, P15379, Q3U8S1, A2APM1,  A2APM4, A2APM3, A2APM2 | DPROT_00261.1 |
| ICOS | inducible T-cell co-stimulator | T cell, status/function | Q3V3X2, Q5SUZ7, Q9WVS0 | DPROT_00086.1 |
| CD19 | CD19 antigen | B cell, marker | P25918, Q3TQG5, A0A0X1KG58 | DPROT_00073.1 |
| CD40 | CD40 antigen | B cell, marker | P27512 | DPROT_00087.1 |
| F4/80 | EGF-like module containing, mucin-like, hormone receptor-like sequence 1 | Myeloid cell, marker | Q3U9R0, Q61549 | DPROT_00071.1 |
| CD14 | CD14 antigen | Myeloid cell, marker | P10810, Q3UB18, Q3UE54, Q4FJP7 | DPROT_00091.1 |
| MHC II | CD74 antigen | Myeloid cell, marker | P04441, Q3U4Q8, Q545Y5 | DPROT_00067.1 |
| CD163 | CD163 antigen | Myeloid cell, marker | B7ZMW6, Q2VLH6 | DPROT_00052.1 |
| CD11c | integrin alpha X | Myeloid cell, marker | Q9QXH4 | DPROT_00072.1 |
| BatF3 | basic leucine zipper transcription factor, ATF-like 3 | Myeloid cell, marker | Q9D275 | DPROT_00351.1 |
| CD11b | integrin alpha M | Myeloid cell, marker | G5E8F1, E9Q604 | DPROT_00068.1 |
| Ly6G/Ly6C | lymphocyte antigen 6 complex, locus G, lymphocyte antigen 6 complex, locus C1 | Myeloid cell, marker | A0A087WQF5, P0CW02, A0A087WNZ5,  A0A087WRG9 | DPROT_00085.1 |
| Fibronectin | fibronectin 1 | Extracellular matrix | A0A087WR50, Q3UGY5, Q3UHR1,  Q3UHL6, A0A087WSN6, Q3TBB4,  B9EHT6, A0A087WS56, Q3UH17,  B7ZNJ1, P11276, Q3UZF9 | DPROT_00081.1 |
| SMA | actin, alpha 2, smooth muscle, aorta | Extracellular matrix | P62737 | DPROT_00023.1 |
| CD31 | platelet/endothelial cell adhesion molecule 1 | Endothelial, marker | Q08481, Q8CAW4 | DPROT_00104.1 |
| CD34 | CD34 antigen | Endothelial, marker | Q543Y2, Q543B6, Q64314 | DPROT_00048.1 |
| Ki-67 | antigen identified by monoclonal antibody Ki 67 | Cell proliferation | E9PVX6 | DPROT_00070.1 |
